# Supplementary material for: High quality white light emission from Sb3+, Tb3+ and Mn2+ co-doped Cs2NaScCl6 double perovskites
Source: Royal Society of Chemistry journal article supplement (doi:10.1039/d4tc03589e), 2024-12-06
Supplement: d4tc03589e1.pdf [file d4tc03589e1.pdf]

## High quality white light emission from $\text{Sb}^{3+}$ , $\text{Tb}^{3+}$ and $\text{Mn}^{2+}$ co-doped

### $\text{Cs}_2\text{NaScCl}_6$ double perovskite

Deyuan Yang<sup>a</sup>, Ruirui Cui<sup>a</sup>, Chaoyong Deng<sup>a, b, \*</sup>

<sup>a</sup> Key Laboratory of Functional Composite Materials of Guizhou Province, College of Big Data and Information Engineering, Guizhou University, Guiyang 550025, China

<sup>b</sup> Guizhou Academy of Sciences, Guiyang 550005, Guizhou, China

---

☆**Foundation item:** Project supported by the National Natural Science Foundation of China (52262020)

\*Corresponding author. Key Laboratory of Functional Composite Materials of Guizhou Province, College of Big Data and Information Engineering, Guizhou University, Guiyang 550025, China

E-mail address: cydeng@gzu.edu.cn (CY Deng).

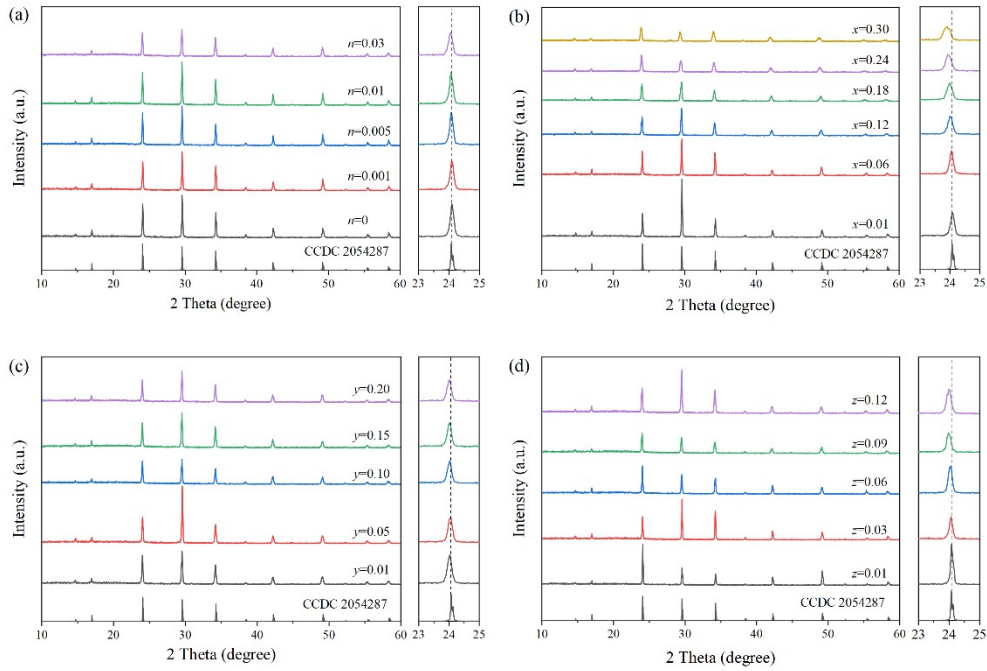

Fig. S1 (a) XRD patterns of CNSC:  $n\text{Sb}^{3+}$ , (b) XRD patterns of CNSC:  $0.01\text{Sb}^{3+}$ ,  $x\text{Tb}^{3+}$ , (c) XRD patterns of CNSC:  $0.01\text{Sb}^{3+}$ ,  $y\text{Mn}^{2+}$ , (d) XRD patterns of CNSC:  $0.01\text{Sb}^{3+}$ ,  $z\text{Tb}^{3+}$ ,  $0.07\text{Mn}^{2+}$ .

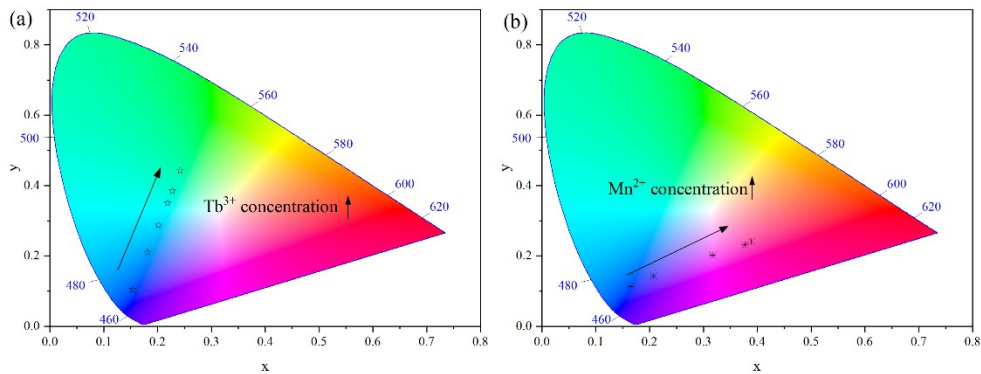

Fig. S2 (a) CIE chromaticity diagram of CNSC:  $0.01\text{Sb}^{3+}$ ,  $x\text{Tb}^{3+}$  ( $x = 0.01, 0.06, 0.12, 0.18, 0.24, 0.3$ ), and (b) CIE chromaticity diagram of CNSC:  $0.01\text{Sb}^{3+}$ ,  $y\text{Mn}^{2+}$  ( $y = 0.01, 0.05, 0.1, 0.15, 0.2$ ).

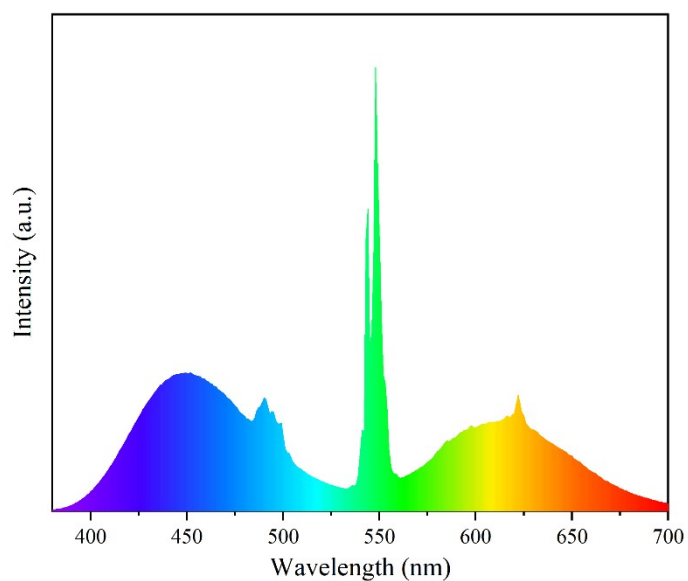

Fig. S3 PL spectra of CNSC:  $\text{Sb}^{3+}$ ,  $\text{Tb}^{3+}$ ,  $\text{Mn}^{2+}$  under the excitation of 336 nm.

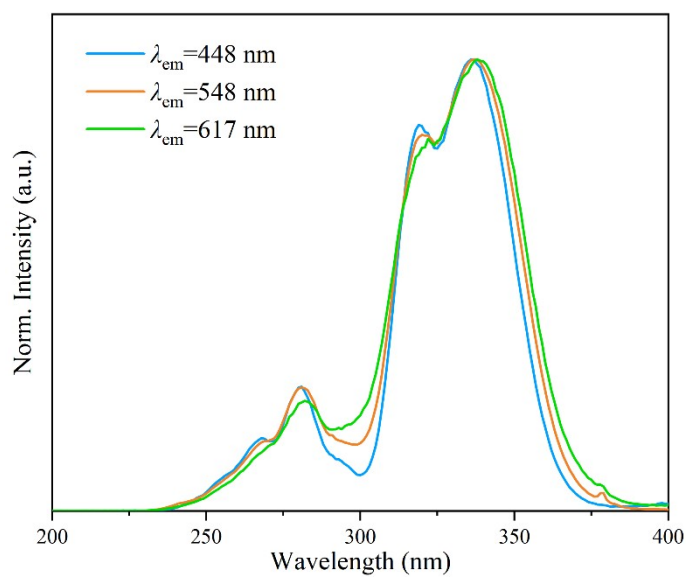

Fig. S4 PLE spectra of CNSC:  $0.01\text{Sb}^{3+}$ ,  $0.12\text{Tb}^{3+}$ ,  $0.07\text{Mn}^{2+}$  were monitored at 448, 548 and 617 nm.

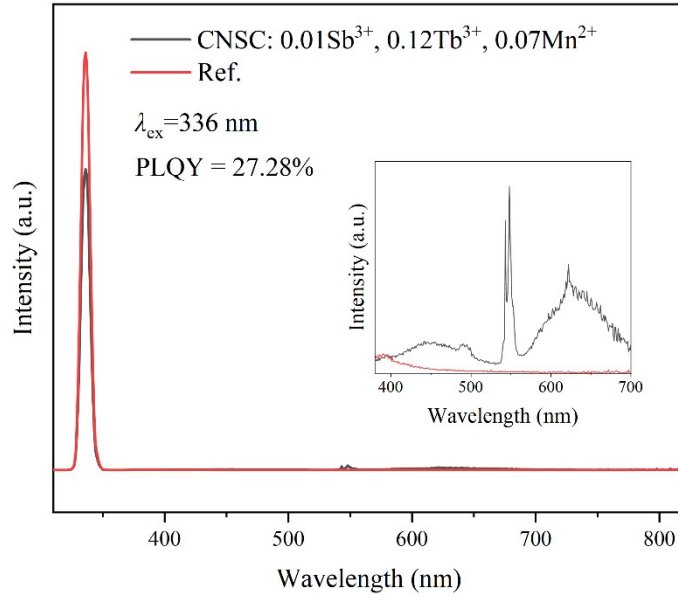

Fig. S5 PLQY of CNSC: 0.01Sb<sup>3+</sup>, 0.12Tb<sup>3+</sup>, 0.07Mn<sup>2+</sup> with white emission.

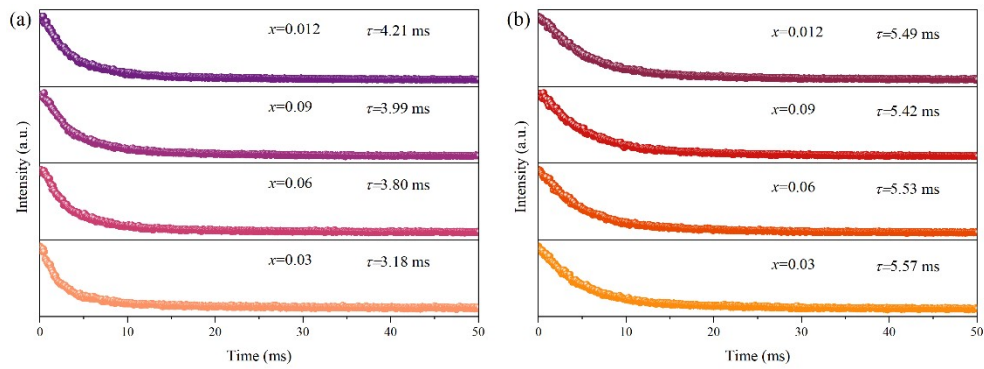

Fig. S6 (a) fluorescence lifetime decay curves of CNSC: 0.01Sb<sup>3+</sup>,  $x$ Tb<sup>3+</sup>, 0.07Mn<sup>2+</sup> monitored at 548 nm, and (b) fluorescence lifetime decay curves of CNSC: 0.01Sb<sup>3+</sup>,  $x$ Tb<sup>3+</sup>, 0.07Mn<sup>2+</sup> monitored at 617 nm.

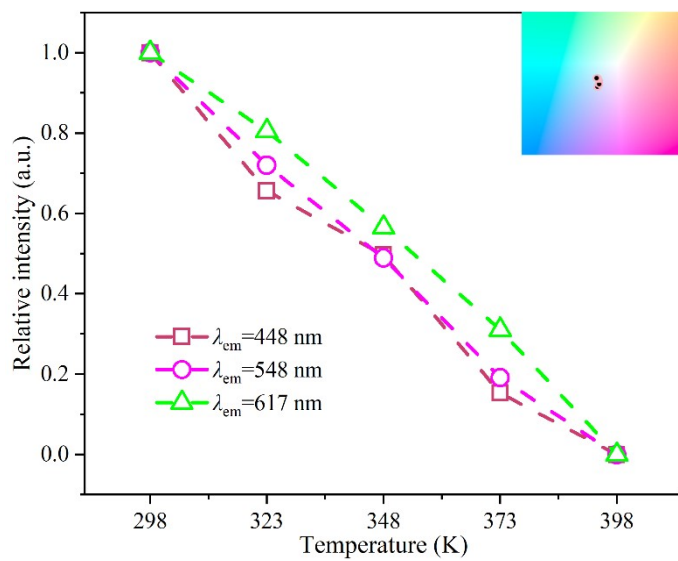

Fig. S7 Dependences of the relative intensities of  $\text{Sb}^{3+}$  (at 448 nm),  $\text{Tb}^{3+}$  (548 nm), and  $\text{Mn}^{2+}$  (at 617 nm) on temperature (inset is the trend of CIE coordinates varying with temperature).

Table S1 The ICP-MS results of CNSC:0.01 $\text{Sb}^{3+}$ , 0.07 $\text{Mn}^{2+}$  (sample 1) and CNSC:0.01 $\text{Sb}^{3+}$ , 0.12 $\text{Tb}^{3+}$ , 0.07 $\text{Mn}^{2+}$  (sample 2). (Fr represents the feed ratio, and A represents the ratio of actual doped ions in all samples)

| Samples | Fr        | Sc<br>(mg/kg) | Sb<br>(mg/kg) | Mn<br>(mg/kg) | Tb<br>(mg/kg) | A                 |
|---------|-----------|---------------|---------------|---------------|---------------|-------------------|
| 1       | 92:1:7    | 72659.2       | 3600.7        | 2762.8        | 0             | 95.3:1.7:3        |
| 2       | 80:1:7:12 | 50766.3       | 2401          | 3588.5        | 27833.3       | 81.3:1.4:4.7:12.6 |

Table S2 The decay lifetimes of STE emission in CNSC: 0.01 $\text{Sb}^{3+}$ ,  $x\text{Tb}^{3+}$ , 0.07 $\text{Mn}^{2+}$  monitored at 448 nm

| $x$  | $A_1$  | $\tau_1$ ( $\mu\text{s}$ ) | $A_2$  | $\tau_2$ ( $\mu\text{s}$ ) | $\tau_{\text{ave}}$ ( $\mu\text{s}$ ) | $\eta_{\text{ET}}$ (%) |
|------|--------|----------------------------|--------|----------------------------|---------------------------------------|------------------------|
| 0    | 0.6641 | 0.00801                    | 0.2358 | 0.7618                     | 0.74                                  | 0                      |
| 0.03 | 0.7234 | 0.00515                    | 0.1937 | 0.5007                     | 0.4824                                | 34.8                   |
| 0.06 | 0.8322 | 0.00579                    | 0.0933 | 0.5047                     | 0.4584                                | 38.1                   |
| 0.09 | 0.6612 | 0.00694                    | 0.2283 | 0.3860                     | 0.3673                                | 50.4                   |
| 0.12 | 0.805  | 0.00294                    | 0.1457 | 0.2194                     | 0.2044                                | 72.4                   |

Table S3 the fabricated WLED device under different operating times. (LF represents luminous flux)

| Time (min) | CIE (x, y)       | CRI  | CCT (K) | LF (lm) |
|------------|------------------|------|---------|---------|
| 0          | (0.3363, 0.3389) | 91.3 | 5330    | 1.76    |
| 10         | (0.3368, 0.3354) | 91.4 | 5310    | 1.71    |
| 20         | (0.3368, 0.3407) | 92.2 | 5301    | 1.41    |
| 30         | (0.3404, 0.3416) | 93.1 | 5159    | 1.28    |
| 40         | (0.3425, 0.3435) | 93.6 | 5078    | 1.08    |

Table S4 the fabricated WLED device under different driving currents. (LF represents luminous flux)

| Current (mA) | CIE (x, y)       | CRI  | CCT (K) | LF (lm) |
|--------------|------------------|------|---------|---------|
| 350          | (0.3531, 0.3569) | 95.2 | 4726    | 1.43    |
| 300          | (0.3549, 0.3601) | 95.4 | 4681    | 1.39    |
| 250          | (0.3586, 0.3638) | 95.7 | 4572    | 1.31    |
| 200          | (0.362, 0.3685)  | 95.8 | 4488    | 1.24    |
| 150          | (0.3663, 0.3748) | 95.9 | 4395    | 1.08    |
| 100          | (0.3715, 0.3778) | 96.1 | 4257    | 1.05    |
